# Supplementary material
Source: publisher figshare collection journal article supplement (https://gsajournals.figshare.com/ndownloader/files/14452679)
Supplement: Supplementary file 1 [file 14452679]

**Table S2** Bowtie2 alignment results of 6,596,939 GBS tags in absolute and relative (in parenthesis) values.

| Reference Genome | Non-aligned  tags | Aligned tags | | |
| --- | --- | --- | --- | --- |
| Overall  alignment | Unique alignment | Non-unique alignment |
| *Panicum hallii* genome | 5,340,535  (80.95%) | 1,256,404  (19.05%) | 1,002,261  (15.19%) | 254,143  (3.85%) |
| *Panicum virgatum* genome | 5,101,776  (77.34%) | 1,495,163  (22.66%) | 503,124  (7.63%) | 992,039  (15.04%) |
| *Setaria italica* genome | 5,143,121  (77.96%) | 1,453,818  (22.04%) | 1,149,693  (17.43%) | 304,125  (4.61%) |
| *Setaria viridis* genome | 5,141,196  (77.93%) | 1,455,743  (22.07%) | 1,164,462  (17.65%) | 291,281  (4.42%) |
| Transcriptome (EMBRAPA) | 4,997,950  (75.76%) | 1,326,602  (20.11%) | 1,244,861  (18.87%) | 81,741  (1.24%) |
| Transcriptome (UNICAMP) | 5,270,337  (79.89%) | 1,598,989  (24.24%) | 839,084  (12.72%) | 759,905  (11.52%) |
